# Supplementary material for: Subcutaneous ticks: a first report in a golden jackal, and their absence in non-canid carnivores
Source: Parasit Vectors. 2021 Jan 5;14:5. doi: 10.1186/s13071-020-04510-7 (PMC7786515; doi:10.1186/s13071-020-04510-7)
Supplement: Supplementary file 1 — Additional file 1. Database with all examined carnivores. [file 13071_2020_4510_MOESM1_ESM.xlsx]

## Sheet: Sheet1
Code	Species	Date of collection	Date of examination	Sex	Age	Locality
CJ004711	Canis lupus	29.12.2015	05.01.2016	F	Adult	Toplița, MS
CJ006959	Canis lupus	05.2017	29.05.2017	M	Adult/Old	Rezervatie de ursi din Brasov - Zarnesti
CJ006961	Canis lupus	07.2017	16.07.2017	M	Adult	Cugir, AB
CJ007148	Canis lupus	08.08.2018	08.08.2018	F	Adult	Valea Chioarului, MM
CJ007816	Canis lupus	01.02.2020	02.02.2020	F	Ad (tanar)	Odorheiu Secuiesc, HR
CJ007825	Canis lupus	10.02.2020	13.02.2020	M	Ad	Tarnova, CS
CJ004194	Canis aureus	-	10.02.2016	?	Adult	Ostrovu Mare, MH
CJ004195	Canis aureus	-	10.02.2016	M	Juvenile	FV 34 Dăbuleni
CJ004196	Canis aureus	-	11.02.2016	F	Adult	Gura Văii, DJ
CJ004197	Canis aureus	-	11.02.2016	M	Juvenile	FV 34 Dăbuleni
CJ004198	Canis aureus	-	18.03.2016	F	Adult	FV Mălăiești, DJ
CJ004199	Canis aureus	-	18.03.2016	?	Adult	FV 62 Cernele ?
CJ005000	Canis aureus	-	19.03.2016	F	Adult	?
CJ005001	Canis aureus	-	26.03.2016	F	Adult	Ostrovu Mare, MH
CJ005002	Canis aureus	-	26.03.2016	M	?	Ostrovu Mare, MH
CJ005004	Canis aureus	-	28.03.2016	F	Adult	Ostrovu Mare, MH
CJ005005	Canis aureus	-	28.03.2016	M	Juvenile	Stârmina, MH
CJ005048	Canis aureus	-	28.10.2016	M	Juvenile	?
CJ005049	Canis aureus	-	28.10.2016	F	Juvenile	?
CJ005051	Canis aureus	-	03.11.2016	F	?	?
CJ005087	Canis aureus	-	21.12.2016	M	Juvenile	?
CJ006884	Canis aureus	12.2016	24.03.2017	F	Adult	Sălcioara, TL
CJ006885	Canis aureus	12.2016	24.03.2017	F	Adult	Sălcioara, TL
CJ006890	Canis aureus	12.2016	27.03.2017	M	Adult	Sălcioara, TL
CJ006897	Canis aureus	2016.10.20	30.03.2017	M	Adult	Sălcioara, TL
CJ006898	Canis aureus	12.2016	30.03.2017	F	Adult	Sălcioara, TL
CJ006899	Canis aureus	12.2016	31.03.2017	M	Adult	Sălcioara, TL
CJ006900	Canis aureus	20.10.2016	31.03.2017	F	Adult	Sălcioara, TL
CJ006901	Canis aureus	-	31.03.2017	M	Juvenile	Sălcioara, TL
CJ006908	Canis aureus	-	12.04.2017	F	Adult	?
CJ006966	Canis aureus	?	?	M	Juvenile	? BZ
CJ006974	Canis aureus	-	11.11.2017	F	Juvenile	? TL
CJ006995	Canis aureus	-	20.12.2017	F	Adult	Cilibia, BZ
CJ006996	Canis aureus	20.10.2016	21.12.2017	F	Juvenile	Sălcioara, TL
CJ006997	Canis aureus	-	21.12.2017	F	Adult	Filiași
CJ007110	Canis aureus	?	12.07.2018	M	Adult	?
CJ007117	Canis aureus	1.2016	19.07.2018	M	Juvenile	Bradesti, DJ
CJ007118	Canis aureus	?	20.07.2018	M	Adult	?
CJ007119	Canis aureus	?	20.07.2018	M	Adult	?
CJ007127	Canis aureus	01.2016	25.07.2018	F	Juvenile	Ostrovu Mare, MH
CJ007128	Canis aureus	2017	25.07.2018	M	Adult	Sălcioara, TL
CJ007129	Canis aureus	?	26.07.2018	M	Adult	?
CJ007130	Canis aureus	2017	26.07.2018	F	Adult	Sălcioara, TL
CJ007132	Canis aureus	29.12.2016	27.07.2018	F	Adult	Frumoasa, TR
CJ007155	Canis aureus	?	23.08.2018	F	Adult	Pestera, CT
CJ007156	Canis aureus	?	23.08.2018	M	Juvenile	?
CJ007159	Canis aureus	21.01.2018	27.08.2018	M	Adult	Slobotia, GR
CJ007160	Canis aureus	?	27.08.2018	F	Adult	Garcov, OT
CJ007161	Canis aureus	?	27.08.2018	F	Juvenile	Drăgănești-Vlașca, TR
CJ007162	Canis aureus	?	27.08.2018	M	Juvenile	Bradesti, DJ
CJ007167	Canis aureus	?	29.08.2018	M	Adult	Zimnicea, TR
CJ007168	Canis aureus	?	29.08.2018	M	Adult	Zimnicea, TR
CJ007169	Canis aureus	?	29.08.2018	M	Juvenile	Vanatori, TR
CJ007170	Canis aureus	?	29.08.2018	M	Juvenile	Zimnicea, TR
CJ007171	Canis aureus	?	30.08.2018	F	Adult	Zimnicea, TR
CJ007263	Canis aureus		05.11.2018	M	Adult	MS
CJ007736	Canis aureus	16.11.2019	18.11.2019	M	Adult	Campia Turzii, CJ
CJ007766	Canis aureus	11.01.2020	13.01.2020	M	Juv	Ersig, Vermes, CS
CJ004456	Felis silvestris	09.2015	15.10.2015	F	Adult	Valea Chioarului, MM
CJ005008	Felis silvestris	02.04.2016	04.04.2016	M	Adult	Mesteacăn, SJ
CJ005027	Felis silvestris		17.10.2016	M	Adult	Valea Chioarului, MM
CJ006424	Felis silvestris	08.01.2017	09.01.2017	M	Adult	Bobâlna, CJ
CJ006865	Felis silvestris	02. 2017	14.03.2017	M	Adult	Dăbâca, CJ
CJ006876	Felis silvestris	19.03.2017	20.03.2017	M	Adult	Vărăi, MM
CJ006960	Felis silvestris	14.07.2017	14.07.2017	M	Juvenile	Crasna, CV
CJ006963	Felis silvestris	19.08.2017	05.09.2017	M	Adult	Valea Chioarului, MM
CJ006967	Lynx lynx	?	25.10.2017	M	Adult	Tureni, Turda, CJ
CJ006969	Felis silvestris	?	27.10.2017	F	Adult	Tureni, Turda, CJ
CJ006971	Felis silvestris	01.2015	02.11.2017	M	Adult	Nehoiu-BZ
CJ006972	Felis silvestris	4.11.2017	06.11.2017	F	Juvenile	Fericea - MM
CJ007000	Felis silvestris	29.12.2017	30.12.2017	M	Adult	Zalău, SJ
CJ007055	Felis silvestris	16.10.2015	08.03.2018	M	Adult	Dealul Somova
CJ007238	Felis silvestris		09.10.2018	M	Adult	Vlaha, CJ
CJ007305	Lynx lynx	05.12.2018	12.12.2018	M	Adult	Cugir, AB
CJ007460	Felis silvestris	01.02.2019	05.02.2019	M	Adult	Săcălăşeni, MM
CJ007461	Felis silvestris	21.01.2019	07.02.2019	F	Adult	Remeţi pe Someş, MM
CJ007463	Felis silvestris	18.02.2019	27.02.2019	M	Adult	Bucium, MM
CJ007573	Felis silvestris		04.07.2019	M	Adult	?
CJ007863	Felis silvestris	11.02.2020	03.03.2020	M	Adult	Zoo Resita, CS
CJ004823	Meles meles		17.02.2016	M	Adult	Maramures
CJ004825	Martes foina		17.02.2016	M	Adult	Arad
CJ004826	Mustela putorius		17.02.2016	M	Adult	Arad
CJ004827	Mustela putorius		17.02.2016	?	Adult	Arad
CJ005003	Meles meles	26.03.2016	28.03.2016	M	Adult	Maramures
CJ005006	Meles meles	30.03.2016	02.04.2016	M	Adult	Satu Lung, Maramures
CJ005007	Meles meles	30.03.2016	02.04.2016	M	Adult	Satu Lung, Maramures
CJ005009	Meles meles	10.04.2016	11.04.2016	M	Adult	Fericea, Maramures
CJ005010	Meles meles	13.04.2016	14.04.2016	M	Adult	Valea Chioarului, Maramures
CJ005011	Meles meles	02.04.2016	09.04.2016	F	Adult	Valea Chioarului, Maramures
CJ005012	Meles meles		11.07.2015	M	Adult	Valea Chioarului, Maramures
CJ005014	Martes martes	19.07.2016	20.07.2016	M	Adult	Livada (Satu-Mare)
CJ005017	Martes foina		04.10.2016	M	Juvenile	Durosa, Maramures
CJ005018	Martes foina		04.10.2016	M	Juvenile	Valea Chioarului, Maramures
CJ005019	Martes foina		04.10.2016	F	Juvenile	Căpâlna, Sălaj
CJ005076	Meles meles		12.12.2016	M	Adult	Lagea Sibiu
CJ005077	Meles meles		12.12.2016	F	Adult	Hărman, Brașov
CJ005078	Meles meles	06.11.2016	15.12.2016	F	Juvenile	Biertan, Sibiu
CJ005083	Lutra lutra		14.12.2016	M	Adult	Saraiu, CT
CJ005086	Meles meles		20.12.2016	F	Juvenile	Charlottenburg, Timiș
CJ005633	Meles meles	19.05.2016	20.05.2016	M	Adult	?
CJ006891	Meles meles	25.03.2017	27.03.2017	F	Adult	Durușa, MM
CJ006892	Lutra lutra	20.09.2016	28.03.2017	M	Adult	JASPSA Marcova
CJ006902	Meles meles		10.04.2017	M	Juvenile	Fond de vanatoare 17 Mădăras, HR
CJ006903	Martes foina		10.04.2017	F	Juvenile	HG
CJ006904	Lutra lutra	21.09.2017	05.10.2017	F	Juvenile	Draghitea, TL
CJ006905	Mustela putorius	26.08.2017	09.10.17	M	Adult	Tohanu Nou, BV
CJ006906	Meles meles	08.10.2017	09.10.2017	M	Adult	Valea Chioarului, MM
CJ006907	Mustela putorius	18.03.2017	10.10.2017	M	Juvenile	Crăciunei, Olt
CJ006908	Meles meles	02.09.2017	02.09.2017	M	Adult	Mândra-Făgăraș
CJ006931	Meles meles	16.04.2017	22.04.2017	M	Juvenile	Apahida, CJ
CJ006932	Meles meles	02.05.2017	04.05.2017	M	Adult	Miresu Mare, MM
CJ006956	Meles meles	13.05.2017	16.05.2017	F	Adult (Old)	Șomcuța Mare, MM
CJ006957	Meles meles		22.05.2017	M	Adult	Valea Chioarului, MM
CJ006958	Meles meles		26.05.2017	M	Adult	Șomcuța Mare, MM
CJ006964	Meles meles	01.09.2017	11.09.2017	M	Adult	Bihor
CJ006965	Meles meles	01.07.2017	19.10.2017	F	Adult (Old)	Văleni de Pomezeu, BH
CJ006968	Meles meles		26.10.2017	M	Adult	Cluj
CJ006982	Meles meles	25.11.2017	27.11.2017	?	Adult	Gâlgău, SJ
CJ006986	Martes martes	23.06.2014	07.12.2017	M	Adult	Căianu Mic, CJ
CJ007001	Meles meles	06.01.2018	08.01.2018	M	Adult	Valea Chioarului, MM
CJ007025	Martes foina	31.01.2018	01.02.2018	M	Juv	Fersig, MM
CJ007031	Meles meles	13.02.2018	14.02.2018	F	Juv	Satulung, MM
CJ007050	Meles meles	17.02.2018	19.02.2018	F	Ad/Old	Valea Chioarului, MM
CJ007063	Meles meles	24.04.2018	25.04.2018	F	Ad	Crasna, SJ
CJ007064	Meles meles	30.04.2018	02.05.2018	M	Ad	Valea Chioarului, MM
CJ007065	Meles meles	01.05.2018	02.05.2018	M	Ad	Vărai, MM
CJ007067	Martes foina	05.05.2018	07.05.2018	F	Ad	Vărai, MM
CJ007068	Meles meles	24.02.2018	09.05.2018	F	Ad	Curtuius Mare
CJ007054	Martes foina	30.12.2016	08.03.2018	M	Juv	Chechis, MM
CJ007105	Meles meles	15.06.2018	27.06.2018	F	Juv	Valea Chioarului, MM
CJ007106	Meles meles	26.05.2018	29.06.2018	M	Ad	Durusa, MM
CJ007108	Meles meles	11.07.2018	12.07.2018	M	Ad	?
CJ007109	Meles meles	05.06.2018	13.07.2018	F	Ad	Grosi, MM
CJ007111	Meles meles	22.06.2018	13.07.2018	M	Ad	Durusa, MM
CJ007112	Martes foina	02.07.2018	17.07.2018	M	Ad	Valea Chioarului, MM
CJ007113	Mustela putorius	05.2018	17.07.2018	M	Ad	Sânt Petru BV
CJ007114	Meles meles	?	18.07.2018	M	Ad	?
CJ007115	Meles meles	19.05.2018	18.07.2018	M	Ad	Valea Chioarului, MM
CJ007116	Meles meles	14.05.2018	19.07.2018	M	Ad	Somcuta Mare, MM
CJ007120	Meles meles	23.07.2018	24.07.2018	M	Ad	CJ
CJ007136	Mustela putorius	2017	31.07.2018	F	Ad	Stoienești, GR
CJ007138	Mustela putorius	?	31.07.2018	?	Ad	Țăndărei, IL
CJ007141	Meles meles	20.03.2018	01.08.2018	M	Ad	Avastani???, MS
CJ007144	Meles meles	15.04.2018	02.08.2018	M	Ad	Dumbraveni, SB
CJ007174	Meles meles	?	31.08.2018	M	Juv	MM
CJ007164	Martes foina	21.08.2017	28.08.2018	F	Ad	Comana, GR
CJ007220	Meles meles	28.09.2018	01.10.2018	F	Ad	SB
CJ007221	Meles meles	29.09.2018	02.10.2018	F	Ad	Valea Chioarului, MM
CJ007228	Meles meles	29.09.2018	03.10.2018	M	Ad	Valea Chioarului, MM
CJ007229	Martes martes	29.09.2018	04.10.2018	F	Ad	Valea Chioarului, MM
CJ007243	Meles meles		13.10.2018	M	Ad	Vărai, MM
CJ007261	Martes foina	08.10.2018	19.10.2018	M	Ad	Somcuta Mare, MM
CJ007480	Meles meles	12.03.2019	14.03.2019	F	Ad	Fericea, MM
CJ007491	Meles meles	20.03.2019	21.03.2019	M	Ad	Bucium, MM
CJ007492	Meles meles	23.03.2019	25.03.2019	F	Ad	Valea Chioarului, MM
CJ007530	Martes foina	07.03.2019	24.04.2019	M	Ad	Salcioara (Poligon), TL
CJ007531	Martes foina	05.01.2019	24.04.2019	M	Ad	Sarica, D.N.
CJ007532	Martes foina	22.04.2019	24.04.2019	M	Ad	Somova E87, TL
CJ007558	Meles meles	22.05.2019	05.06.2019	M	Juv	Popesti, CJ
CJ007559	Meles meles	?	12.06.2019	M	Ad	Fericea, MM
CJ007572	Meles meles	16.06.2019	03.07.2019	F	Ad	Valea Chioarului, MM
CJ007574	Meles meles	07.07.2019	08.07.2019	M	Juv	? Gherman
CJ007575	Meles meles	02.07.2019	11.07.2019	F	Juv	Fericea, MM
CJ007576	Meles meles	02.11.2018	18.07.2019	M	Ad	Valea Chioarului, MM
CJ007577	Martes foina	20.07.2019	22.07.2019	F	Ad	Valea Chioarului, MM
CJ007578	Martes martes	19.07.2019	23.07.2019	M	Ad	Stejera, MM
CJ007620	Mustela erminea	05.09.2019	16.09.2019	M	Juv	Banisor, SJ
CJ007621	Meles meles	13.09.2019	17.09.2019	M	Ad	Tihuta, BN
CJ007638	Meles meles	10.08.2019	18.09.2019	?	?	Sirioara, BN
CJ007713	Meles meles	27.09.2019	02.10.2019	M	Ad	Valea Chioarului, MM
CJ007714	Meles meles	29.09.2019	03.10.2019	F	Ad	Valea Chioarului, MM
CJ007715	Meles meles	25.09.2019	03.10.2019	F	Old	Durusa, MM
CJ007716	Martes foina	05.05.2019	17.10.2019	M	Ad	Valea Chioarului, MM
CJ007718	Martes foina	17.10.2019	22.10.2019	M	Ad	Valea Chioarului, MM
CJ007719	Martes foina	18.10.2019	23.10.2019	F	Ad	Fericea, MM
CJ007721	Meles meles	20.10.2019	30.10.2019	M	Juv	Varai, MM
CJ007722	Mustela lutreola	08.08.2016	01.11.2019	F	Ad	Enisala, TL
CJ007737	Meles meles	24.11.2019	25.11.2019	M	Ad	Blaj, AB
CJ007755	Meles meles		08.01.2020	M	Ad	Uileac de Cris
CJ007807	Meles meles	20.07.2019	23.01.2020	M	Juv	Valea Chioarului, MM
CJ007808	Meles meles		23.01.2020	M	Ad	Cuzap, Borod, Micesti????
CJ007809	Meles meles	20.08.2019	24.01.2020	F	Juv	Curtuiusu Mare, MM
CJ007811	Martes foina	25.08.2019	25.01.2020	M	Juv	Valea Chioarului, MM
CJ007813	Meles meles	?	29.01.2020	M	Ad	Cuzap, Borod, Micesti????
CJ007824	Meles meles	06.09.2019	12.02.2020	M	Ad	Valea Chioarului, MM
CJ007826	Meles meles	10.02.2020	17.02.2020	M	Ad	Tarnova, CS
CJ007850	Mustela nivalis	?	27.02.2020	M	Juv	?
CJ007862	Meles meles	01.03.2020	03.03.2020	F	Ad	Mociu, CJ
CJ007898	Meles meles	07.03.2020	10.03.2020	M	Ad	Valea Sebesului, AB
CJ007899	Martes foina	08.02.2020	10.03.2020	M	Ad	Mesteacan, MM
CJ007900	Meles meles	07.03.2020	10.03.2020	F	Ad	Iesire Vaciu, CJ
CJ007948	Mustela putorius	06.12.2016	19.03.2020	M	Ad	Baia de Fier, GJ
CJ007958	Meles meles	19.03.2020	05.05.2020	M	Ad	A10-Alba, AB
CJ007965	Canis aureus	07.03.2020	01.06.2020	F	Adult	Magura, UP VII, Giurgiu
CJ007967	Canis aureus	12.2019	02.06.2020	M	Adult	ocolul silvic Giurgiu
CJ007968	Canis aureus	25.01.2019	04.06.2020	M	Adult	Magura, UA 18, Giurgiu
CJ007969	Canis aureus	25.03.2020	09.06.2020	F	Adult	Up VII Balta, Giurgiu
CJ007970	Canis aureus	10.2019	10.06.2020	F	Adult	Ocolul Silvic Comana, Giurgiu
